# Supplementary material for: Properties of aerosols and formation mechanisms over southern China duringthe monsoon season
Source: Copernicus journal article supplement (doi:10.5194/acp-16-13271-2016), 2016-10-28
Supplement: Supplementary file 1 [file acp-16-13271-2016-supplement.zip]

## Sheet: GZ
Date	SO₄²⁻							NO₃⁻							NH₄⁺							OC							EC							Na⁺							K⁺
	10～18	10～2.5	2.5～1.4	1.4～1.0	1.0～0.44	0.44～0.25	<0.25	10～18	10～2.5	2.5～1.4	1.4～1.0	1.0～0.44	0.44～0.25	<0.25	10～18	10～2.5	2.5～1.4	1.4～1.0	1.0～0.44	0.44～0.25	<0.25	10～18	10～2.5	2.5～1.4	1.4～1.0	1.0～0.44	0.44～0.25	<0.25	10～18	10～2.5	2.5～1.4	1.4～1.0	1.0～0.44	0.44～0.25	<0.25	10～18	10～2.5	2.5～1.4	1.4～1.0	1.0～0.44	0.44～0.25	<0.25	10～18	10～2.5	2.5～1.4	1.4～1.0	1.0～0.44	0.44～0.25	<0.25
2010-05-04	779.844	1945.02	1356.77	1409.44	3328.62	1258.95	378.177	377.646	4032.2	981.18	367.916	779.962	183.03	110.136	14.348	300.969	229.079	280.005	1229.82	197.134	175.959		1450	640	580	1510	1170	1720		200	80	90	240	150	650	1027.48	2442.31	1172.91	876.009	950.161	873.549	52.6385	12.5526	90.7194	41.4489	29.4122	82.7831	29.3958	13.5908
2010-05-08	311.411	1355.42	1356.51	1515.49	5926.28	1221.86	620.486	213.654	2684.01	963.777	634.468	1611.8	262.512	184.096	13.4749	243.284	645.015	727.303	1969.31	410.313	292.571		1860	700	580	1840	1460	1840		240	60	50	430	100	830	55.8846	731.739	147.729	72.4626	920.88	37.7163	42.5946	10.4563	70.1707	32.8593	40.9906	165.341	56.2113	23.8508
2010-05-12	221.531	1711.79	1840.37	3158.5	7900.44	1532.16	603.686	504.162	5878.02	1424.18	1225.27	3650.05	587.542	304.518	64.8304	722.315	980.876	1466.86	3567.4	785.098	306.333		2980	1050	850	2440	2130	1820		660	220	310	1090	760	1030	59.0883	1000.05	253.556	87.5195	285.493	103.012	50.4115	8.93733	107.246	64.8911	77.3913	280.049	92.134	28.316
2010-05-16	184.531	1395.39	1495.24	1958.41	5427.96	1281.44	606.156	231.432	2887.97	853.016	489.278	1312.69	351.495	243.728	42.9433	212.39	646.455	831.329	1947.71	621.719	280.336		1940	730	550	1400	1210	1510		510	210	200	980	580	860	38.148	714.113	174.262	107.83	255.339	50.3456	87.0768	6.52476	67.473	36.4137	49.0103	194.029	68.4492	29.1027
2010-05-20	195.981	1273.92	396.384	498.049	1891.11	709.126	488.38	144.502	1754.79	389.291	110.357	374.282	68.1406	142.46	44.0712	144.201	100.297	137.216	884.712	246.042	234.414		1470	580	440	1350	1100	1460		250	90	70	470	350	800	94.9328	969.985	165.789	71.259	95.6649	17.8848	90.7585	7.37694	57.1781	16.1515	21.605	83.3837	31.5776	22.0245
2010-05-24	222.201	1205.69	1504.06	2346.72	8317.59	2446.05	1048.34	581.924	4733.38	1548.63	1633.82	5124.96	801.778	500.997	44.1846	591.307	865.169	1280.58	4082.59	1121.48	570.377		2670	1110	880	2480	1740	2090		500	200	230	870	780	950	56.6213	424.941	109.356	135.98	243.126	142.559	112.27	11.4474	91.7493	67.8452	87.5665	316.63	100.92	41.9365
2010-05-26	183.291	1083.83	1022.81	1828.68	6141.14	2510.14	1482.62	509.587	4248.88	965.065	791.4	2526.25	618.272	471.34	42.8022	313.541	389.822	838.577	2474.64	1080.2	907.737		2960	1380	1290	3310	2580	2540		700	200	270	1790	1180	1390	45.3499	500	169.298	155.715	350.299	216.818	97.5431	7.97252	91.8104	56.4354	82.5657	365.256	162.963	54.7451
2010-06-05	186.006	1281.99	1337.22	2438.25	7648.67	1578.25	807.995	465.09	3903.45	775.631	470.354	1325.62	339.653	190.06	62.2356	215.156	397.985	1008.92	2823.95	764.051	171.172		1550	620	540	1640	1030	1470		340	120	230	660	420	340	69.0031	838.155	172.384	149.817	171.404	132.802	224.601	7.58854	65.6357	35.6527	65.2849	195.034	65.9576	25.9738
2010-06-12	286.021	3714.97	5565.45	4632.86	8424.97	1679.78	815.977	603.472	4990.4	3412.05	2791.2	5955.72	884.962	414.675	42.6046	1008.62	2504.61	2214.92	4247.36	954.087	192.978		4690	1560	1430	3710	2600	2650		2310	1150	1170	5170	2860	1590	13.238	127.221	64.7781	87.1325	320.176	157.382	270.926	9.64189	146.167	190.996	221.027	570.066	148.014	34.7576
2010-06-18	143.026	1048.73	353.802	376.008	2583.73	841.387	644.993	87.7034	1585.62	374.068	72.5284	106.776	42.9177	80.3398	-0.212602	54.1631	50.1502	86.3982	869.539	265.471	82.1951		1480	510	390	1050	900	1350		420	130	110	580	490	500	90.1135	1320.7	235.948	78.938	187.719	58.527	246.464	5.26944	75.8972	22.4145	21.2713	152.876	66.7147	21.3225
[truncated: 42 more columns]

## Sheet: ZH
Date	SO₄²⁻							NO₃⁻							NH₄⁺							OC							EC							Na⁺							K⁺
	10～18	10～2.5	2.5～1.4	1.4～1.0	1.0～0.44	0.44～0.25	<0.25	10～18	10～2.5	2.5～1.4	1.4～1.0	1.0～0.44	0.44～0.25	<0.25	10～18	10～2.5	2.5～1.4	1.4～1.0	1.0～0.44	0.44～0.25	<0.25	10～18	10～2.5	2.5～1.4	1.4～1.0	1.0～0.44	0.44～0.25	<0.25	10～18	10～2.5	2.5～1.4	1.4～1.0	1.0～0.44	0.44～0.25	<0.25	10～18	10～2.5	2.5～1.4	1.4～1.0	1.0～0.44	0.44～0.25	<0.25	10～18	10～2.5	2.5～1.4	1.4～1.0	1.0～0.44	0.44～0.25	<0.25
2010-05-12	58.4025	1070.3	1874.84	2563.43	6889.2	1285.02	423.315	363.832	2820.62	712.931	132.237	136.55	25.9868	31.4207	57.2431	249.163	531.296	852.074	2313.84	507.25	141.246		370	220	220	660	390	1230		120	110	130	410	240	620	82.6587	1285.76	382.82	138.938	192.26	13.3192	11.6636	6.01938	67.3519	52.5096	52.3284	109.944	14.6613	8.60621
2010-05-18	35.5318	447.235	449.223	808.673	3362.27	1012.45	330.586	139.511	1445.13	193.64	9.24547	18.8221	3.22687	5.92223	-0.26331	24.7025	55.8888	209.585	1145.44	350.501	96.7347		400	180	120	350	300	1270		80	50	60	250	180	630	59.4678	828.666	134.483	22.6984	93.7149	35.7174	13.0117	1.82244	30.524	11.534	7.21701	52.621	16.2075	4.49846
2010-05-24	69.3269	734.235	1099.27	1853.61	5489.62	1383.85	733.37	408.461	2256.33	379.168	172.808	209.878	62.4256	53.7777	49.0349	167.081	358.497	667.391	2112.06	535.361	218.448		1070	400	380	870	710	1510		290	130	150	650	380	670	61.7222	530.103	86.4951	82.0395	62.7669	24.1736	41.103	4.753	47.9211	27.5158	40.9612	115.27	33.2043	12.3503
2010-06-01	51.2737	703.551	1269.62	1748.94	5028.41	1013.08	335.246	146.167	1742.1	736.527	321.531	365.639	58.3322	49.7926	16.0636	138.923	490.917	672.537	1367.31	390.297	103.809		530	240	200	480	500	830		130	90	130	360	260	280	43.5016	818.392	262.904	98.8209	115.151	53.8385	51.5574	2.28558	44.7843	27.5614	24.0199	57.5493	17.1829	7.3768
2010-06-05	172.728	651.039	749.644	1281.53	4338.87	1247.45	491.285	330.915	2345.47	213.507	67.9165	48.5748	17.1662	28.5659	14.5437	107.053	125.088	478.624	1340.26	487.381	158.515		460	230	240	820	460	1050		90	60	100	410	260	470	149.549	888.333	178.137	75.8158	94.9147	45.8755	52.601	3.44027	41.4995	15.9028	27.9568	64.0083	20.9846	5.07713
2010-06-07	51.1851	763.745	920.136	1515.42	6030.7	1472.02	483.917	280.041	2624.07	189.201	17.5659	4.62065	0.229602	10.0597	24.6146	55.0823	159.637	496.467	1677.82	510.227	165.252		280	140	110	510	340	830		90	50	70	290	140	310	66.9945	1107.1	216.8	62.2018	169.389	87.75	-2.48364	3.46748	44.9442	17.6506	20.2382	78.9553	24.4504	6.2542
2010-06-12	75.1907	810.622	1466.48	1931.47	5303.83	1436.12	334.42	217.923	2053.72	642.172	441.549	1309.92	108.347	132.505	17.4099	320.773	611.015	794.872	2099.73	606.805	150.781		1440	600	630	1910	1140	1920		310	200	430	1360	890	750	42.1384	593.155	128.719	157.496	143.54	27.8116	46.9006	5.54631	64.6363	47.4137	79.8818	189.286	39.1635	11.4925
2010-06-18	37.4913	548.037	201.8	194.298	1440.48	637.453	116.564	59.3081	1044.02	243.76	20.3533	0.613487	-0.535084	5.77078	6.65764	15.1262	14.9725	30.6373	506.906	184.397	45.1127		320	140	100	230	300	850		120	80	50	160	140	380	90.9156	1477.36	241.84	46.6789	64.2326	36.7818	-0.921746	2.93951	50.7124	8.80325	6.54684	22.0367	14.3482	3.04665
[truncated: 42 more columns]

## Sheet: JFM
Date	SO₄²⁻							NO₃⁻							NH₄⁺							OC							EC							Na⁺							K⁺
	10～18	10～2.5	2.5～1.4	1.4～1.0	1.0～0.44	0.44～0.25	<0.25	10～18	10～2.5	2.5～1.4	1.4～1.0	1.0～0.44	0.44～0.25	<0.25	10～18	10～2.5	2.5～1.4	1.4～1.0	1.0～0.44	0.44～0.25	<0.25	10～18	10～2.5	2.5～1.4	1.4～1.0	1.0～0.44	0.44～0.25	<0.25	10～18	10～2.5	2.5～1.4	1.4～1.0	1.0～0.44	0.44～0.25	<0.25	10～18	10～2.5	2.5～1.4	1.4～1.0	1.0～0.44	0.44～0.25	<0.25	10～18	10～2.5	2.5～1.4	1.4～1.0	1.0～0.44	0.44～0.25	<0.25
2011-04-30	9.08523	161.19	177.005	335.372	1554.68	430.175	-28.9512	43.9801	733.064	210.657	45.5697	56.1544	18.7475	2.09129	0.465171	9.65388	9.98438	54.0169	503.78	99.5887	4.59298															-5.59281	298.89	118.765	52.8791	66.9103	56.238	2.22578	-0.42996	38.8784	13.2622	16.0572	71.3632	26.1726	0.165452
2011-05-04	12.7107	224.279	203.014	278.883	1881.36	685.383	78.2252	71.1863	815.499	252.666	30.6899	23.9634	12.9415	5.30294	0.0619698	7.78945	7.66609	46.2124	469.498	141.841	25.0455		910	220	170	870	600	1200		120	30	20	140	120	340	42.4427	362.573	126.454	32.9069	87.2985	76.9944	12.325	1.3243	33.8703	11.1984	15.6671	84.2172	45.4778	16.8207
2011-05-08	11.2339	102.984	92.8013	183.972	1246.69	584.991	89.0168	37.1037	430.965	121.758	21.4843	20.6939	17.0413	0.926561	0.391152	4.95514	3.40809	33.1961	393.769	140.675	32.5052		1090	290	220	1040	880	920		130	40	30	190	170	320	25.3122	267.12	125.658	58.6409	88.7463	66.9759	33.8646	0.766409	30.6884	10.6552	11.5417	86.964	76.1352	36.2404
2011-05-13	30.8314	223.038	288.633	417.439	2131.77	623.243	95.7962	57.3988	671.168	135.502	11.0409	3.62037	3.71277	1.37289	0.154235	4.96853	6.11788	34.9295	578.724	154.936	28.4192															232.593	322.384	255.061	195.36	-61.0393	-135	22.0823	4.81229	35.8165	8.17439	5.76316	43.3827	21.0972	13.6548
2011-05-15	14.944	205.032	114.866	165.245	1098.74	569.691	117.693	48.1904	688.105	91.1747	1.57274	0.673361	1.35845	21.2564	1.60494	19.7913	12.9051	43.6787	361.309	183.14	4.84839		1370	160	100	300	310	650		90	30	20	140	120	90	33.4733	501.399	79.4646	14.1322	33.273	6.34084	29.1385	2.82348	50.9475	6.73792	7.20666	51.0415	34.0387	9.76671
2011-05-17	24.3872	205.276	174.206	280.696	1499.75	641.63	102.653	62.9689	676.656	146.79	20.8382	16.5083	9.69126	19.9416	0.261045	2.70144	1.74358	12.4142	310.48	70.9992	3.12536		810	180	130	440	360	430		60	20	20	80	50	70	183.585	631.886	276.1	181.593	213.445	156.394	123.118	0.406661	28.8068	8.97268	10.3766	53.3168	28.8053	8.87598
2011-05-19	21.9383	164.035	142.332	104.876	1027.1	588.343	153.402	67.9561	566.709	193.035	35.2633	32.0511	19.7563	29.2383	-0.368887	3.29317	0.916581	3.68682	252.031	131.713	5.72835		560	240	150	800	540	740		40	20	20	90	60	120	-300.072	-6.47872	375.786	-54.7526	-1.09202	56.5664	213.721	-2.40136	13.8971	7.43828	2.32426	46.0294	37.0524	12.4798
2011-05-24	2.09242	123.929	307.748	552.821	1614.93	407.843	117.891	27.4206	219.523	10.7751	6.92455	13.6906	3.38732	24.0602	4.05535	20.9251	90.6639	196.235	575.516	166.918	20.7953		1190	200	160	490	290	850		200	80	70	310	140	130	6.6699	99.1299	29.0694	9.82642	20.3602	56.047	37.2978	3.86912	35.715	14.0196	14.7793	55.6931	28.0114	10.751
2011-05-26	4.56484	73.9654	61.8386	87.2472	533.58	263.737	111.986	22.7787	336.932	61.8046	5.68019	3.95794	2.30804	20.0468	4.85265	23.65	12.8719	30.4046	213.947	114.199	18.5714		930	230	120	370	300	760		120	50	20	120	90	90	-6.39478	104.363	36.659	3.72019	1.38124	-5.60209	9.85576	-0.537104	20.1617	7.42316	7.87332	35.0939	23.3019	10.86
2011-05-28	5.9939	79.6902	65.054	74.1855	463.353	248	93.9833	18.9107	340.248	80.2449	5.17612	5.07992	2.55912	23.2273	1.41896	10.1035	8.97841	18.4931	150.227	89.1034	10.9007		760	180	80	260	160	590		100	40	10	90	50	90	1.04019	103.33	30.4183	8.50733	2.6901	24.7448	-4.31323	0.917678	18.5727	6.62139	6.19477	27.4476	23.6738	6.58447
2011-05-30	3.24515	107.237	103.128	110.447	720.179	358.063	127.618	26.7469	508.099	88.3166	6.57886	5.59285	2.71081	25.2163	-0.293569	8.14096	7.17175	26.3622	276.34	120.171	16.2849		600	180	120	400	340	820		210	50	40	220	160	130	0.877927	147.583	45.1998	7.98962	29.6625	51.6283	25.6517	0.802396	24.0293	10.1287	7.76135	49.6948	38.1496	13.939
2011-06-01	15.6007	204	203.669	289.936	1260.73	389.305	135.507	49.5562	718.853	126.291	15.9553	25.2506	2.27034	31.8854	1.07061	18.4058	30.3295	83.5014	427.977	128.101	14.4419		610	230	140	460	370	600		170	70	50	300	190	100	4.26254	177.795	74.9703	30.8456	18.9877	57.6007	14.0314	1.03221	25.049	14.6502	14.4585	64.4713	43.3405	13.5085
2011-06-03	24.4918	309.559	599.699	1358.6	3544.25	422.809	117.951	22.821	173.612	34.8281	47.2989	69.6906	6.20564	29.9045	2.98822	35.0187	204.803	466.159	1098.87	154.304	5.54736		1800	210	210	690	300	540		340	150	110	310	120	100	-6.37299	7.49145	29.002	2.45372	145.849	6.63233	38.7414	2.39181	72.6138	25.5932	32.6251	97.2799	23.2521	10.0083
2011-06-05	14.6191	243.802	640.599	1267.46	3146.71	456.725	97.6282	23.7593	274.949	26.3497	13.185	8.64392	2.57579	27.5166	-1.19946	15.2492	148.489	365.832	898.237	100.949	3.02059		1590	240	200	500	180	350		330	120	70	150	30	70	9.34459	106.267	82.5295	63.2187	142.731	55.4963	5.73498	1.27169	56.5839	21.3216	27.0493	73.3295	17.9441	2.22662
2011-06-07	3.57273	68.5261	46.2451	87.9961	375.569	172.944	62.7597	22.2683	202.104	48.4119	5.97272	1.8024	0.521758	3.26697	0.36563	3.2207	0.885808	6.25858	95.6972	35.7091	1.3312		1160	180	90	260	200	380		140	30	20	30	20	50	45.784	503.176	81.4533	357.528	47.1246	31.7568	-6.34099	1.90163	29.0982	6.08807	5.10931	16.8222	8.65333	1.53264
2011-06-09	15.1419	112.348	69.657	72.2139	446.145	214.357	64.8601	28.2587	295.914	81.5702	13.1635	11.9161	11.2242	17.3468	0.219827	2.95698	2.75323	8.18395	110.211	52.0656	3.08459		810	240	130	460	440	470		120	30	20	70	70	80	25.5725	145.529	49.7676	80.3921	83.9906	43.7596	16.2419	0.487037	19.5776	5.80376	3.38127	26.8912	21.1009	5.94644
2011-06-11	17.7379	82.0838	67.3824	70.0982	386.091	217.338	81.7715	30.9082	283.316	75.4212	15.5309	12.0704	10.8738	13.2141	0.770133	2.77232	2.47285	8.33188	99.868	60.8877	5.50199		780	250	150	540	540	540		130	30	20	90	80	70	21.7732	159.324	51.3197	45.7497	27.1425	-13.3631	-1.81273	1.71653	21.9823	5.34565	4.31581	30.5394	23.1765	6.3614
2011-06-13		216.909	76.5843	86.9503	585.44	404.763	125.499		434.207	88.9266	17.6923	17.741	17.1128	17.2244		8.51414	4.19745	12.6092	183.508	113.979	18.8508		660	230	160	800	790	630		70	30	20	90	110	90		251.448	44.102	3.99324	50.9316	78.7443	48.8806		20.9628	6.09389	3.97565	42.4494	29.0087	10.7819
2011-06-15	20.1998	113.2	87.5955	109.289	706.067	468.115	135.486	58.7441	470.922	114.856	21.6947	15.5144	12.1339	15.042	0.599494	7.08535	4.6537	16.2981	222.222	121.573	15.4995		640	240	190	690	650	650		70	30	20	140	110	90	15.2698	198.395	62.8595	18.0077	74.8237	72.7	10.5214	1.18854	19.5659	6.18674	6.10508	49.4797	32.8247	10.6682
2011-06-19	15.5667	152.198	83.8574	72.6691	573.34	391.063	94.9513	41.3531	539.609	152.171	20.0244	11.7361	8.44608	17.48	0.394492	12.624	3.86265	7.52896	183.997	107.714	7.14353		340	180	130	450	380	530		70	40	20	100	50	70	62.4582	443.21	130.359	29.4841	51.0699	17.5228	24.1764	1.02249	19.2458	5.22143	2.50849	29.4345	21.8883	6.91031
[truncated: 42 more columns]

## Sheet: README
The file include the mass size distribution of aerosol chemical components at the three sites during May-June, 2010
Negative and Missing value means the value below the detection limit
unit	ng m-3
Sampling sites	GZ	Guangzhou
	ZH	Zhuhai
	JFM	Jianfeng Moutain
chemical components	SO₄²⁻	sulfate
	NO₃⁻	nitrate
	NH₄⁺	ammonium
	OC	oganic carbon
	EC	elemental carbon
	Na⁺	sodium
	K⁺	pottasium
	Mg²⁺	manganese
	Ca²⁺	calcium
	Cl⁻	chloride
	F⁻	fluoride
	NO2⁻	nitrite
	Br⁻	bromide
size range (um)	10～18	OC and EC doesn't have this range
	10～2.5
	2.5～1.4
	1.4～1.0
	1.0～0.44
	0.44～0.25
	<0.25
