# Supplementary material for: Properties of aerosols and formation mechanisms over southern China duringthe monsoon season
Source: Copernicus journal article supplement (doi:10.5194/acp-16-13271-2016), 2016-10-28

**Figure S1.** Case study on 12<sup>th</sup> Jun. in GZ and ZH ((a) 72 h air mass backward trajectories in GZ, (b-c) 3D distribution of 24h air mass back trajectories on lower level (100, 300 and 500m) and on higher level (1000, 1500 and 2000m) in GZ; (d-e) West-east and North-south cross-section of the vertical distribution of the residence times at 23.12 ° and 113.36 °E (just in GZ); (f-i) The mass size distribution of  $\text{NH}_4^+$ , OC, EC and  $\text{K}^+$  in GZ; (j) The mass size distribution of  $\text{NO}_3^-$  in ZH)

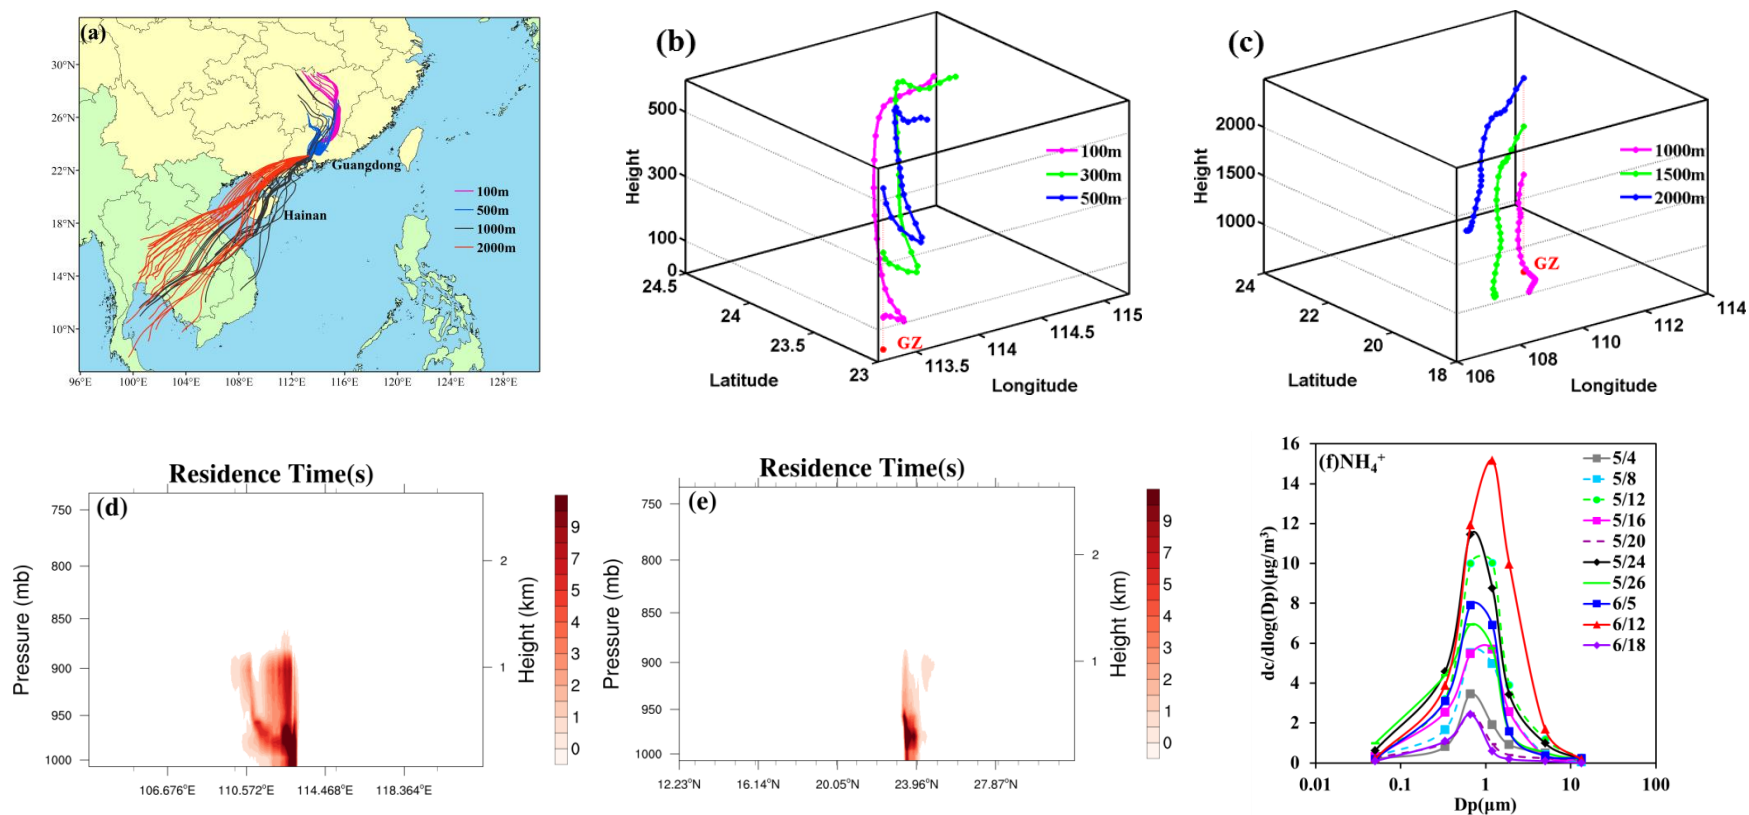

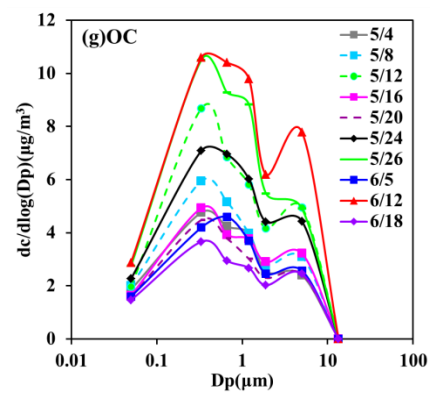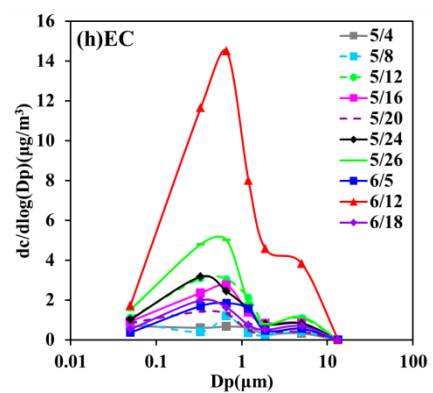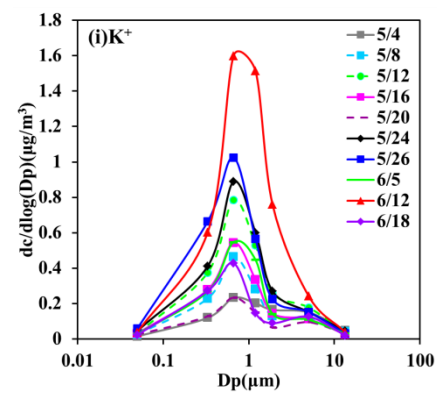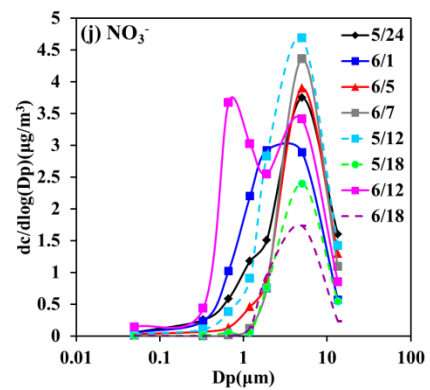

**Figure S2.** Case study on 1<sup>st</sup>, 3<sup>rd</sup> and 5<sup>th</sup> Jun. in JFM ((a) 72 h air mass backward trajectories; (b-e) The mass size distribution of  $\text{NH}_4^+$ , OC, EC and  $\text{K}^+$ )

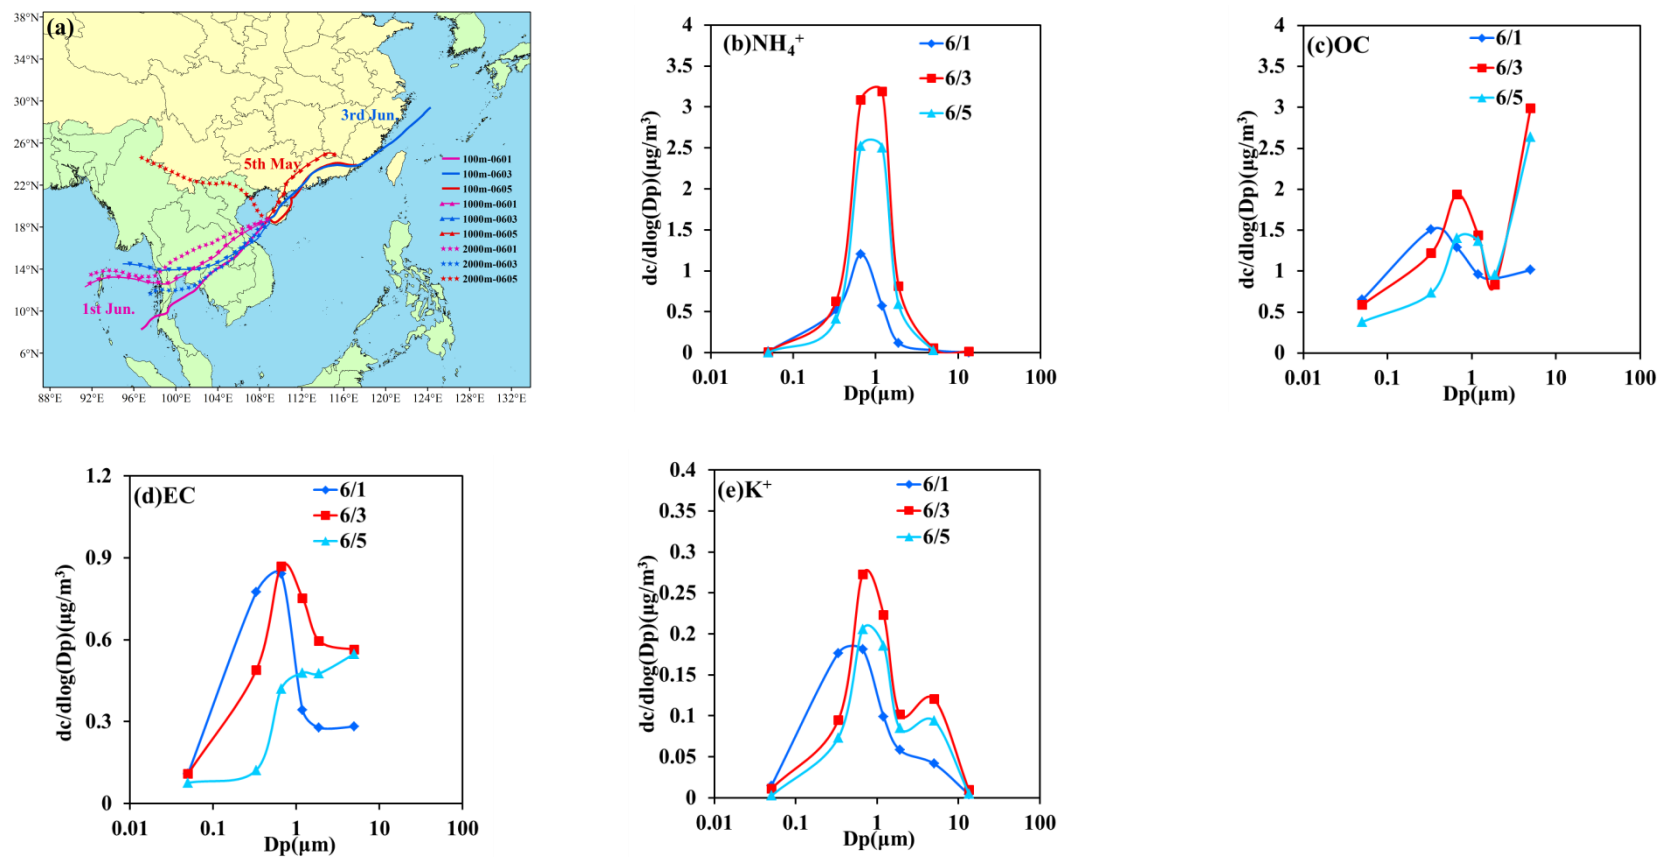

Supplement: Supplementary file 1 [file acp-16-13271-2016-supplement.zip]
