# Supplementary material for: Properties of aerosols and formation mechanisms over southern China duringthe monsoon season
Source: Copernicus journal article supplement (doi:10.5194/acp-16-13271-2016), 2016-10-28
Supplement: Supplementary file 2 [file acp-16-13271-2016-supplement.zip]

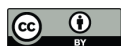

## *Supplement of*

# **Properties of aerosols and formation mechanisms over southern China during the monsoon season**

**Weihua Chen et al.**

*Correspondence to:* Xuemei Wang (eeswxm@mail.sysu.edu.cn) and Shengzhen Zhou (zszking@126.com)

- [acp-16-13271-2016-supplement-title-page.pdf](#)
- [acp-2016-390-supplement.pdf](#)
- [sizedata.xlsx](#)

The copyright of individual parts of the supplement might differ from the CC-BY 3.0 licence.
